# Supplementary material for: The rise and fall of breakpoint reuse depending on genome resolution
Source: PubMed Central journal article supplement (PMC3283316; doi:10.1186/1471-2105-12-s9-s1), 2011-10-05
Supplement: 1471-2105-12-S9-S1-S1.pdf [file 1471-2105-12-S9-S1-S1.pdf]

## Appendix: Capping Examples for the DCJ Paradigm

These examples are taken from Yancopoulos S, Attie O, Friedberg R: Efficient sorting of genomic permutations by translocation, inversion and block interchange. *Bioinformatics* 2005, 21(16):3340-3346.

### Example from Figure 7

| Genome A | Genome B |
|----------|----------|
| -1 3 2   | 1, 2, 3  |

After capping genomes become:

| Genome A       | Genome B      |
|----------------|---------------|
| 0, -1, 3, 2, 4 | 5, 1, 2, 3, 6 |

Cap identification

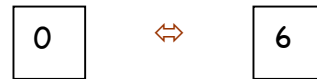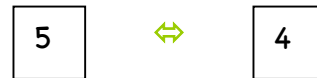

The transformation from Genome A to Genome B has

4 breakpoints and 2 cycles:

$$b = 4 \quad c = 2 \Rightarrow b - c = 2 \Leftrightarrow 2 \text{ DCJ}$$

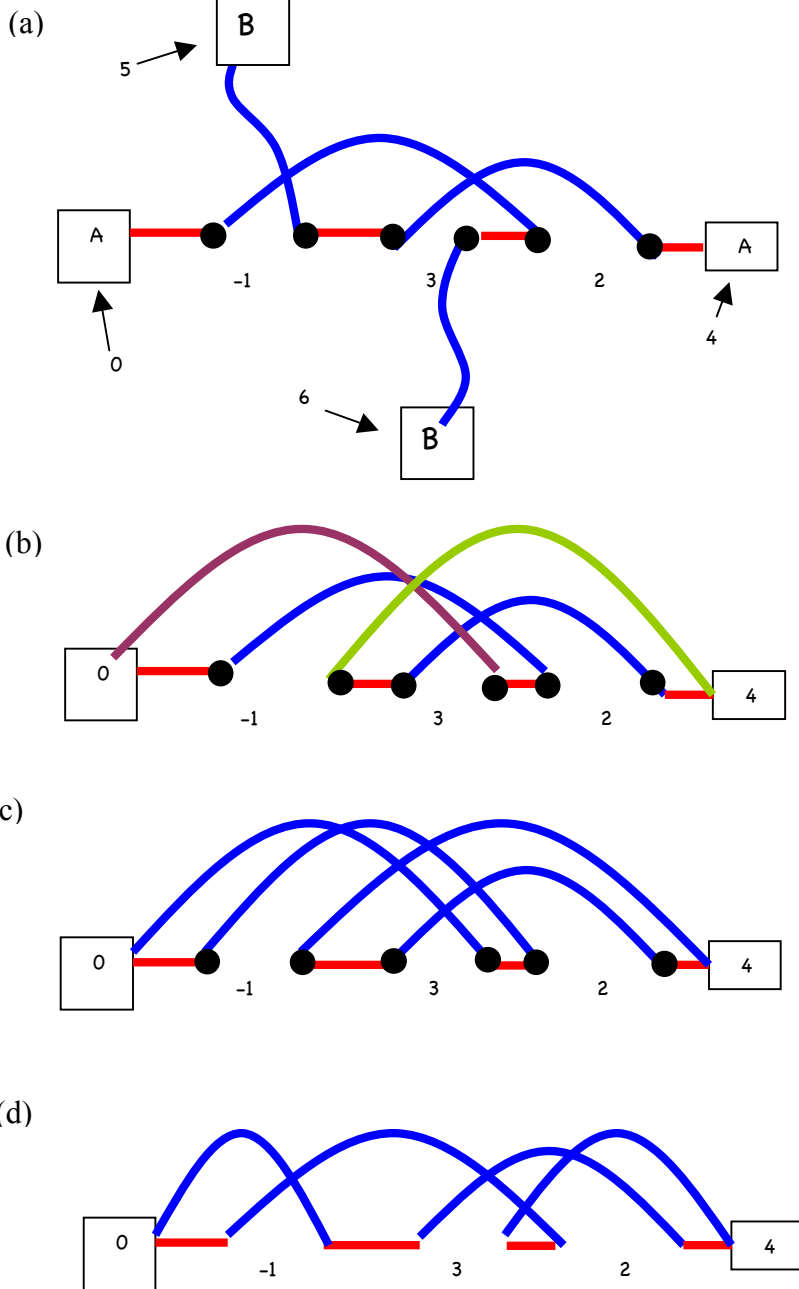

In (a) caps (shown in square boxes) are placed at the ends of chromosomes for telomeric gene ends. A-caps label telomeric gene ends in genome A, and B-caps label telomeric gene ends in B. In (b) A-B paths have their caps identified, ie 0 is identified with 6, and 5 is identified with 4, and the paths are closed. (c) shows the diagram with uniform colors.

Note that the canonical DCJ capping scheme we arrived at in (c) is different than a naïve capping scheme we might have chosen such as shown in (d). This latter scheme would result in a DIFFERENT DCJ distance since it has

$$b = 4 \quad c = 1 \Rightarrow b - c = 4 - 1$$

$\Leftrightarrow 3 \text{ DCJ operations}$

**Example from Figure 8**

|           |          |
|-----------|----------|
| Genome A  | Genome B |
| -1, -3, 2 | 1, 2, 3  |

After capping, the genomes become:

|                     |               |
|---------------------|---------------|
| Genome A            | Genome B      |
| 0, -1, -3, 2, 4     | 5, 1, 2, 3, 6 |
| + Null chromosomes: |               |
| 5 — 6               | 0 — 4         |

The transformation from Genome A to Genome B has 5 breakpoints and 2 cycles:  $b = 5$   $c = 2 \Rightarrow b - c = 3$   
 $\Leftrightarrow 3$  DCJ operations

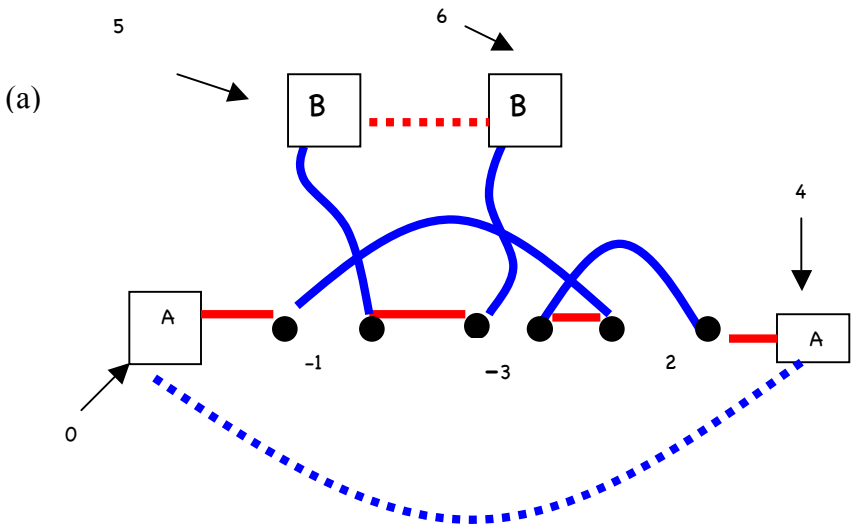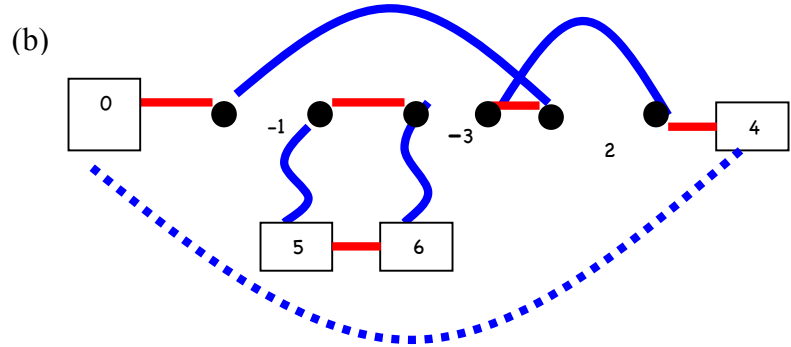

In (a) we cap genome A with (0) and (4), and genome B with (5) and (6). There is one AA and one BB path. Each is closed by an extra (dotted) line which amounts to creating a null chromosome in the opposite genome providing an extra breakpoint so that  $b - c = 5 - 2 = 3$ . The null chromosome in A is (5,6) and in B, (0,4).

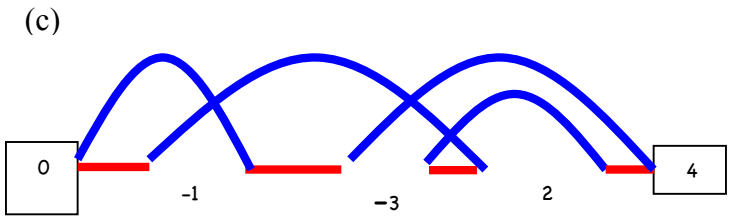

Note that the canonical DCJ capping scheme we arrived at in (b) is *different* than a capping scheme we might have chosen such as shown in (c). This latter scheme would also result in the same DCJ distance since it has  $b = 4$   $c = 1 \Rightarrow b - c = 4 - 1$   
 $\Leftrightarrow 3$  DCJ operations
